# Supplementary material for: A tight-binding model for the electronic structure of MXene monolayers
Source: Royal Society of Chemistry journal article supplement (doi:10.1039/d2nr00745b), 2022-01-01
Supplement: d2nr00745b1.pdf [file d2nr00745b1.pdf]

Supporting information

## Tight-binding model for the electronic structure of MXene monolayers

Alireza Mostafaei<sup>1</sup> and Ebrahim Heidari Semiromi<sup>1</sup>

<sup>1</sup> Department of Physics, University of Kashan, Kashan, 87317-53153, Iran

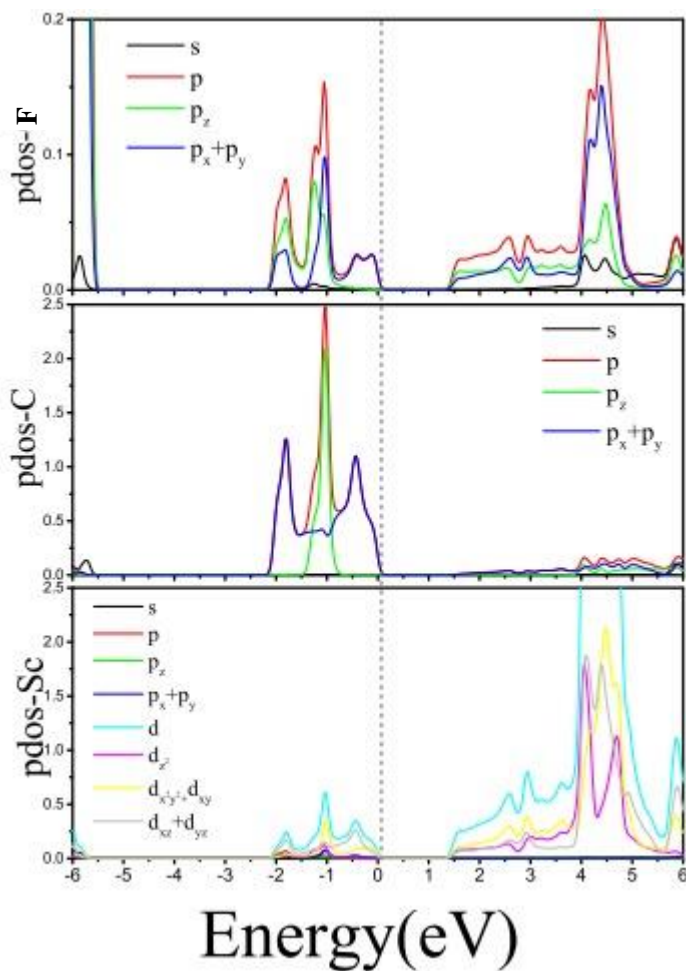

Fig. S11: The projected density of states (PDOS) on atomic orbitals of Sc, F, and C atoms of Sc<sub>2</sub>CF<sub>2</sub>, respectively. Fermi energy is located at zero.

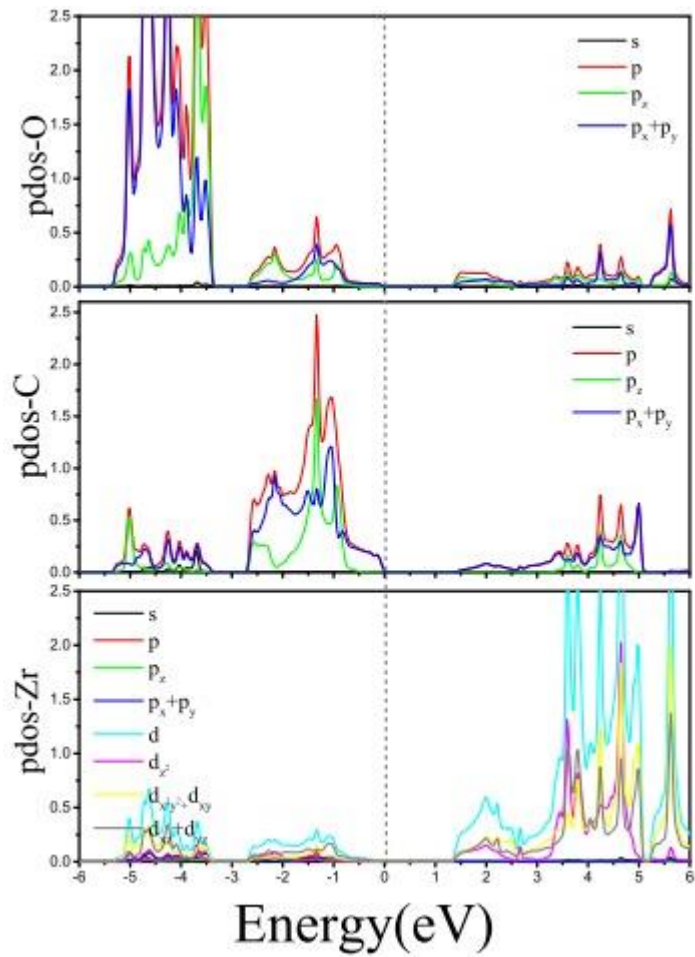

Fig. S12: The projected density of states (PDOS) on atomic orbitals of Zr, O, and C atoms of Zr<sub>2</sub>CO<sub>2</sub>, respectively. Fermi energy is located at zero.

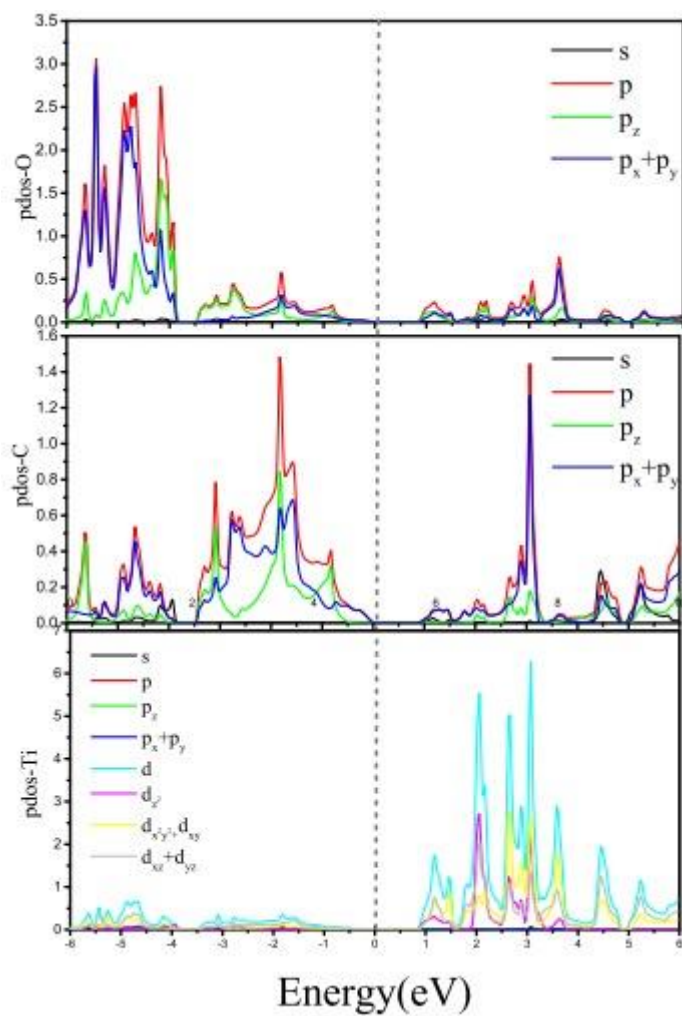

Fig. SI3: The projected density of states (PDOS) on atomic orbitals of Ti, O, and C atoms of  $\text{Ti}_2\text{CO}_2$ , respectively. Fermi energy is located at zero.
